# Supplementary material for: Genome-Wide Assessment of Runs of Homozygosity by Whole-Genome Sequencing in Diverse Horse Breeds Worldwide
Source: MDPI journal article supplement (doi:10.3390/genes14061211), 2023-06-01
Supplement: s1 [file s1]

# Genome-wide assessment of runs of homozygosity by whole-genome sequencing in diverse horse breeds worldwide

## Supplementary files

**Table S1.** Mapping results of clean reads against horse reference genome.

| Sample | Clean reads | Mapped reads | Mapping rate (%) | Average depth (X) | Coverage at least 1X (%) | Coverage at least 4X (%) |
|--------|-------------|--------------|------------------|-------------------|--------------------------|--------------------------|
| AB_17A | 471333056   | 469131719    | 0.9953           | 24.98             | 0.9835                   | 0.9485                   |
| AB_2   | 1465449498  | 1442850879   | 0.9846           | 70.42             | 0.991                    | 0.9758                   |
| AB_24A | 704078740   | 700436947    | 0.9948           | 36.5              | 0.9886                   | 0.9631                   |
| AB_24B | 483069738   | 480439075    | 0.9946           | 25.52             | 0.9843                   | 0.9507                   |
| AB_MET | 371662830   | 359474445    | 0.9672           | 14.67             | 0.9779                   | 0.9255                   |
| AL_12A | 1272099926  | 1265483272   | 0.9948           | 64.17             | 0.9913                   | 0.9753                   |
| AL_12B | 596912856   | 594116950    | 0.9953           | 31.47             | 0.9857                   | 0.9555                   |
| AL_12C | 522077762   | 519352038    | 0.9948           | 27.7              | 0.9858                   | 0.9531                   |
| AL_12D | 501115756   | 497575978    | 0.9929           | 26.18             | 0.9846                   | 0.951                    |
| AT_19  | 477872184   | 474976981    | 0.9939           | 24.89             | 0.9847                   | 0.9508                   |
| AT_23A | 555574922   | 552432275    | 0.9943           | 30                | 0.9869                   | 0.9564                   |
| AT_23C | 651144578   | 646733923    | 0.9932           | 35.14             | 0.9889                   | 0.9618                   |
| AT_3   | 1307683510  | 1299154576   | 0.9935           | 65.28             | 0.9915                   | 0.9769                   |
| AT_5   | 449808036   | 447410324    | 0.9947           | 23.73             | 0.9841                   | 0.9496                   |
| CR_10  | 455050378   | 453076568    | 0.9957           | 24.14             | 0.9839                   | 0.9495                   |
| CR_4   | 1501677796  | 1493422745   | 0.9945           | 76.46             | 0.9931                   | 0.9802                   |
| DB_14A | 1346581062  | 1334857939   | 0.9913           | 69.07             | 0.9916                   | 0.9753                   |
| DB_14B | 442554626   | 440585471    | 0.9956           | 23.7              | 0.9842                   | 0.9493                   |
| DB_14C | 454130138   | 452339864    | 0.9961           | 24.21             | 0.9838                   | 0.9482                   |
| DB_14D | 634080784   | 631454414    | 0.9959           | 33.15             | 0.9887                   | 0.9604                   |
| DB_14E | 504937958   | 502667784    | 0.9955           | 26.5              | 0.9853                   | 0.9522                   |
| FS_11A | 1257054024  | 1249607080   | 0.9941           | 64.57             | 0.989                    | 0.9713                   |
| FS_11B | 492508732   | 490484758    | 0.9959           | 26.12             | 0.9841                   | 0.9517                   |
| FS_11C | 448653154   | 446801396    | 0.9959           | 23.8              | 0.9828                   | 0.9488                   |
| FS_11D | 494933218   | 493017897    | 0.9961           | 26.19             | 0.9843                   | 0.9521                   |
| FS_11E | 471181678   | 468792849    | 0.9949           | 25.72             | 0.9825                   | 0.948                    |
| HAN1   | 695723316   | 669180169    | 0.9618           | 26.6              | 0.9887                   | 0.9533                   |
| HAN2   | 307104000   | 291931975    | 0.9506           | 12.08             | 0.973                    | 0.9109                   |
| HAN3   | 295239106   | 290625783    | 0.9844           | 12.2              | 0.9734                   | 0.9048                   |
| HAN4   | 279654242   | 274951397    | 0.9832           | 11.61             | 0.9724                   | 0.8973                   |
| JEJU1  | 400304134   | 388880872    | 0.9715           | 13.98             | 0.9775                   | 0.912                    |
| JEJU2  | 403284330   | 394627782    | 0.9785           | 13.67             | 0.9773                   | 0.905                    |
| MG_16A | 1420917578  | 1399822152   | 0.9852           | 67.11             | 0.9916                   | 0.975                    |
| MG_16B | 488242312   | 484891796    | 0.9931           | 25.43             | 0.9849                   | 0.9501                   |

|            |            |            |        |       |        |        |
|------------|------------|------------|--------|-------|--------|--------|
| MG_16C     | 495659876  | 493130560  | 0.9949 | 26.16 | 0.9847 | 0.9493 |
| MG_D2628   | 670705898  | 666239953  | 0.9933 | 26.14 | 0.9843 | 0.9413 |
| MG_D2629   | 893708808  | 887577234  | 0.9931 | 33.73 | 0.9888 | 0.9558 |
| MON_FM0450 | 398669810  | 397050697  | 0.9959 | 16.45 | 0.9718 | 0.9166 |
| MON_FM1030 | 435248512  | 432172536  | 0.9929 | 17.35 | 0.973  | 0.9241 |
| MON_FM1190 | 412950454  | 410573136  | 0.9942 | 16.52 | 0.9723 | 0.9221 |
| MON_FM1798 | 551612288  | 547671135  | 0.9929 | 22    | 0.9775 | 0.9352 |
| MON_FM1951 | 491849372  | 488580384  | 0.9934 | 19.48 | 0.976  | 0.9297 |
| PRZ_D2630  | 575973260  | 571359508  | 0.992  | 22.16 | 0.9813 | 0.9311 |
| PRZ_D2631  | 735775306  | 731227103  | 0.9938 | 28.3  | 0.9855 | 0.9463 |
| PRZ_SB159  | 421145912  | 416580331  | 0.9892 | 15.1  | 0.9702 | 0.9124 |
| PRZ_SB274  | 262067206  | 259008746  | 0.9883 | 10.08 | 0.9497 | 0.8275 |
| PRZ_SB281  | 407830422  | 399720934  | 0.9801 | 14.23 | 0.9696 | 0.9061 |
| PRZ_SB285  | 309606552  | 305921145  | 0.9881 | 11.71 | 0.9573 | 0.8675 |
| PRZ_SB339  | 335191688  | 331522803  | 0.9891 | 12.4  | 0.9601 | 0.8804 |
| PRZ_SB524  | 496950092  | 492304055  | 0.9907 | 17.34 | 0.9748 | 0.9296 |
| PRZ_SB615  | 306239644  | 302146935  | 0.9866 | 11.15 | 0.9579 | 0.8618 |
| PRZ_SB966  | 374263918  | 370707173  | 0.9905 | 13.81 | 0.9684 | 0.9096 |
| QT_22A     | 1414382142 | 1403659890 | 0.9924 | 70.82 | 0.9935 | 0.9826 |
| QT_22B     | 445582284  | 442025912  | 0.992  | 24.11 | 0.9853 | 0.9506 |
| QT_22C     | 510163930  | 507754657  | 0.9953 | 27.73 | 0.9861 | 0.9546 |
| QT_A1543   | 282160770  | 280598076  | 0.9945 | 11.68 | 0.9634 | 0.8802 |
| QT_A2085   | 279585894  | 278001549  | 0.9943 | 11.73 | 0.9615 | 0.867  |
| QT_A5659   | 342193142  | 339978914  | 0.9935 | 13.84 | 0.969  | 0.9035 |
| QT_A5964   | 342108290  | 339918219  | 0.9936 | 13.8  | 0.9652 | 0.9002 |
| ST_13A     | 1364181834 | 1354624556 | 0.993  | 69.27 | 0.9914 | 0.9755 |
| ST_SPH020  | 629763348  | 625849185  | 0.9938 | 24.85 | 0.9872 | 0.951  |
| ST_SPH041  | 572600368  | 568488749  | 0.9928 | 22.68 | 0.9857 | 0.9476 |
| STD_M1009  | 225581310  | 224189163  | 0.9938 | 9.69  | 0.9628 | 0.8421 |
| STD_M5256  | 260763222  | 259073713  | 0.9935 | 10.8  | 0.9607 | 0.8658 |
| STD_M977   | 297562442  | 295915553  | 0.9945 | 12.01 | 0.9652 | 0.8983 |
| STD_ST22   | 874232206  | 872044754  | 0.9975 | 32.12 | 0.9895 | 0.9593 |
| TB_5       | 545231814  | 542254795  | 0.9945 | 27.66 | 0.9865 | 0.957  |
| TB_6       | 528018910  | 524231041  | 0.9928 | 26.85 | 0.9863 | 0.9547 |
| TB_7       | 1299193532 | 1291659229 | 0.9942 | 66.81 | 0.9922 | 0.9772 |
| TB_8       | 558480678  | 555461210  | 0.9946 | 28.11 | 0.9878 | 0.9589 |
| TB_9       | 542264920  | 539395586  | 0.9947 | 27.3  | 0.9867 | 0.9574 |
| TB_TB03    | 837984126  | 836047281  | 0.9977 | 30.98 | 0.9896 | 0.9586 |
| TB_TB10    | 867060418  | 865158724  | 0.9978 | 31.71 | 0.9888 | 0.9585 |
| TB_thb1    | 436349272  | 425060441  | 0.9741 | 13.07 | 0.9782 | 0.9021 |
| TB_thb10   | 388213896  | 384599221  | 0.9907 | 15.37 | 0.9793 | 0.9228 |
| TB_thb11   | 470077452  | 455929397  | 0.9699 | 13.81 | 0.9805 | 0.9156 |
| TB_thb12   | 479312482  | 469927384  | 0.9804 | 16.53 | 0.9819 | 0.9285 |
| TB_thb13   | 464112948  | 458567526  | 0.9881 | 17.74 | 0.9812 | 0.9318 |

|          |            |            |        |       |        |        |
|----------|------------|------------|--------|-------|--------|--------|
| TB_thb14 | 457444368  | 454469990  | 0.9935 | 18.38 | 0.9819 | 0.9332 |
| TB_thb2  | 431590084  | 415548384  | 0.9628 | 12.86 | 0.9783 | 0.9034 |
| TB_thb3  | 436349272  | 425060441  | 0.9741 | 13.07 | 0.9782 | 0.9021 |
| TB_thb4  | 422333114  | 409962038  | 0.9707 | 14.56 | 0.9794 | 0.9188 |
| TB_thb5  | 419238334  | 408399681  | 0.9741 | 13.83 | 0.9784 | 0.9135 |
| TB_thb6  | 466451738  | 454308682  | 0.974  | 14.45 | 0.9798 | 0.9167 |
| TB_thb7  | 483638634  | 473170070  | 0.9784 | 14.25 | 0.9799 | 0.9135 |
| TB_thb8  | 390136878  | 377909067  | 0.9687 | 13.14 | 0.9761 | 0.902  |
| TB_thb9  | 399429568  | 388950915  | 0.9738 | 12.45 | 0.9768 | 0.9041 |
| TB_TWI   | 742581666  | 739877687  | 0.9964 | 28.35 | 0.9868 | 0.9479 |
| YAK1     | 553205004  | 543780184  | 0.983  | 18.93 | 0.9739 | 0.9277 |
| YAK2     | 897135906  | 886153834  | 0.9878 | 29.71 | 0.9862 | 0.9555 |
| YAK3     | 548175044  | 536315398  | 0.9784 | 18.47 | 0.9748 | 0.9324 |
| YAK4     | 467721960  | 453811212  | 0.9703 | 16.08 | 0.9689 | 0.9126 |
| YAK5     | 552779254  | 540225170  | 0.9773 | 18.7  | 0.9737 | 0.9306 |
| YAK6     | 600858092  | 591688805  | 0.9847 | 20.5  | 0.9763 | 0.9365 |
| YAK7     | 1118670734 | 1101118366 | 0.9843 | 36.31 | 0.988  | 0.9611 |
| YAK8     | 457535456  | 449313223  | 0.982  | 16.19 | 0.9706 | 0.9163 |
| YAK9     | 466595932  | 455458059  | 0.9761 | 16.33 | 0.9717 | 0.9196 |

---

**Table S2.** The statistics of ROH on each chromosome in the Thoroughbred population.

| Chr   | Total<br>No.of<br>ROH | ROH total<br>length (bp) | Length of each<br>Chr (bp) | ROH<br>Coverage (%) |
|-------|-----------------------|--------------------------|----------------------------|---------------------|
| Chr1  | 997                   | 53087.12365              | 188260.577                 | 28.20               |
| Chr2  | 522                   | 24050.38857              | 121350.024                 | 19.82               |
| Chr3  | 550                   | 26526.95657              | 121351.753                 | 21.86               |
| Chr4  | 559                   | 31820.77617              | 109462.549                 | 29.07               |
| Chr5  | 494                   | 21701.48226              | 96759.418                  | 22.43               |
| Chr6  | 516                   | 21236.28509              | 87230.776                  | 24.34               |
| Chr7  | 441                   | 21237.26952              | 100787.686                 | 21.07               |
| Chr8  | 426                   | 20135.38122              | 97563.019                  | 20.64               |
| Chr9  | 370                   | 17663.77391              | 85793.548                  | 20.59               |
| Chr10 | 359                   | 16762.71391              | 85155.674                  | 19.68               |
| Chr11 | 341                   | 13635.25674              | 61676.917                  | 22.11               |
| Chr12 | 115                   | 4124.997174              | 36992.759                  | 11.15               |
| Chr13 | 163                   | 6170.784435              | 43784.481                  | 14.09               |
| Chr14 | 432                   | 23580.80765              | 94600.235                  | 24.93               |
| Chr15 | 371                   | 17871.08978              | 92851.403                  | 19.25               |
| Chr16 | 376                   | 22113.27822              | 88962.352                  | 24.86               |
| Chr17 | 432                   | 25531.71948              | 80722.43                   | 31.63               |
| Chr18 | 404                   | 24606.48257              | 82641.348                  | 29.78               |
| Chr19 | 290                   | 13276.84013              | 62681.739                  | 21.18               |
| Chr20 | 298                   | 13838.44691              | 65343.332                  | 21.18               |
| Chr21 | 290                   | 15074.83822              | 58984.458                  | 25.56               |
| Chr22 | 273                   | 11266.40852              | 50928.189                  | 22.12               |
| Chr23 | 248                   | 11995.27387              | 55556.184                  | 21.59               |
| Chr24 | 221                   | 9146.348478              | 48288.683                  | 18.94               |
| Chr25 | 156                   | 6086.842696              | 40282.968                  | 15.11               |
| Chr26 | 216                   | 9018.652348              | 43147.642                  | 20.90               |
| Chr27 | 171                   | 7170.719087              | 40254.69                   | 17.81               |
| Chr28 | 220                   | 9033.619348              | 47348.498                  | 19.08               |
| Chr29 | 102                   | 4163.748478              | 34776.12                   | 11.97               |
| Chr30 | 146                   | 6808.866696              | 31395.959                  | 21.69               |
| Chr31 | 132                   | 6188.802783              | 26001.039                  | 23.80               |

**Table S3.** The top functional categories enriched for candidate genes located in ROH islands in Thoroughbreds.

| Category              | Term description                                | Involved gene number | P value (EASE scores) |
|-----------------------|-------------------------------------------------|----------------------|-----------------------|
| KEGG-pathway:ecb04725 | Cholinergic synapse                             | 5                    | 6.89E-04              |
| GO:0007286            | spermatid development                           | 3                    | 1.61E-02              |
| KEGG-pathway:ecb04723 | Retrograde endocannabinoid signaling            | 4                    | 1.68E-02              |
| GO:0005513            | detection of calcium ion                        | 2                    | 2.26E-02              |
| GO:0098712            | L-glutamate import across plasma membrane       | 2                    | 2.64E-02              |
| GO:0010460            | positive regulation of heart rate               | 2                    | 3.01E-02              |
| GO:0042417            | dopamine metabolic process                      | 2                    | 3.38E-02              |
| KEGG-pathway:ecb04911 | Insulin secretion                               | 3                    | 3.83E-02              |
| GO:0046039            | GTP metabolic process                           | 2                    | 4.11E-02              |
| GO:0043524            | negative regulation of neuron apoptotic process | 3                    | 4.25E-02              |
| GO:0019221            | cytokine-mediated signaling pathway             | 3                    | 4.61E-02              |
| GO:0060047            | heart contraction                               | 2                    | 4.84E-02              |
